# Supplementary material
Source: PubMed Central journal article supplement (PMC3029487)
Supplement: NIHMS237607-supplement-01.pdf [file NIHMS237607-supplement-01.pdf]

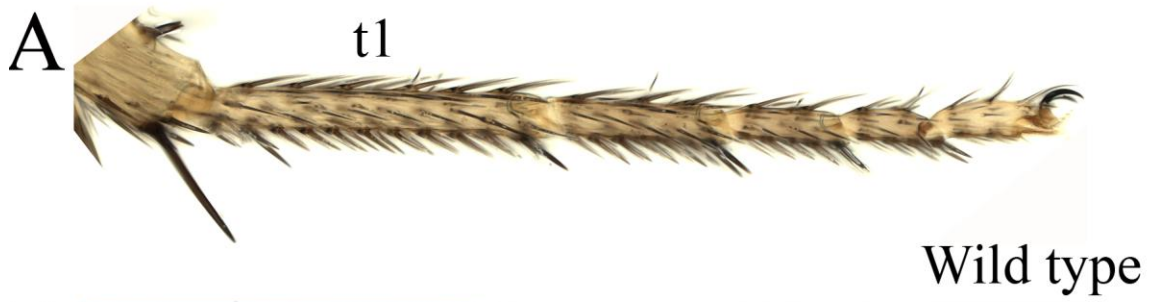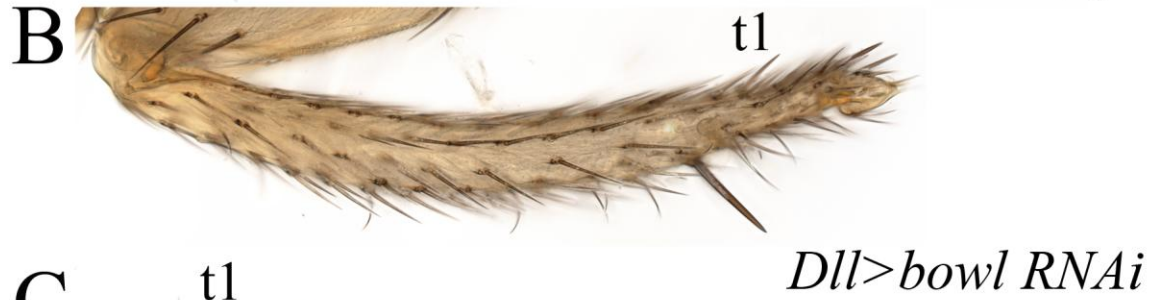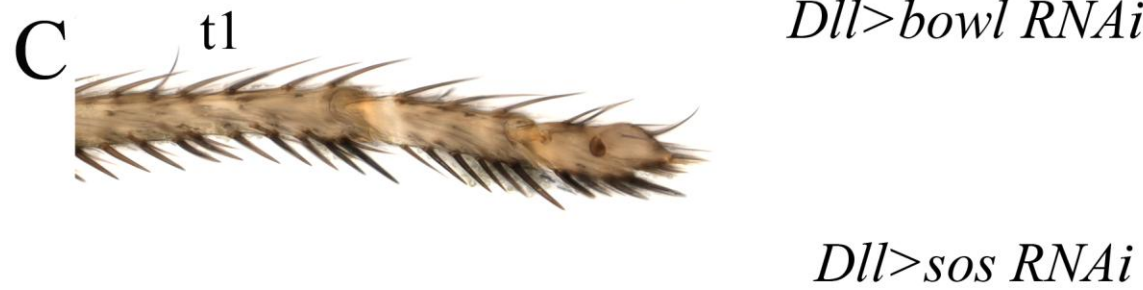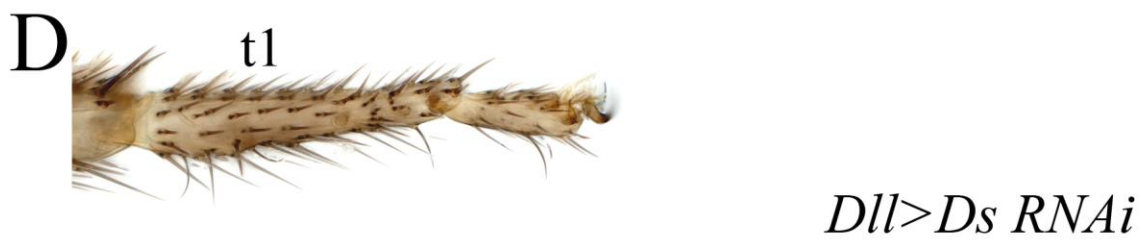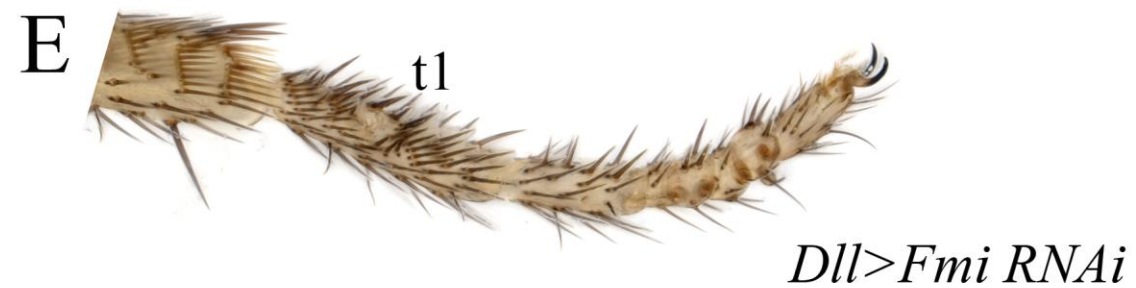

|    | CG number | Gene name      | Chron | VDRG lethal/sterile | VDRG ID | DII-Gal4                                                          | DII-Gal4; UAS-Dicer                                      |
|----|-----------|----------------|-------|---------------------|---------|-------------------------------------------------------------------|----------------------------------------------------------|
| 1  | CG6811    | RhoGAP68F      | 2     | lethal              | 34249   | NP                                                                | NP                                                       |
| 2  | CG6811    | RhoGAP68F      | 3     | lethal              | 34250   | NP                                                                | shortened tarsal fused segments; partially formed joints |
| 3  | CG32149   | RhoGAP71E      | 2     | viable              | 41861   | distal truncations, missing and partially formed joints           | necrosis of distal leg                                   |
| 4  | CG32149   | RhoGAP71E      | 1     | viable              | 41862   | distal truncations, missing and partially formed joints           | necrosis of distal leg                                   |
| 5  | CG3208    | RhoGAP5A       | 3     | viable              | 41780   | bent tibia & femur                                                | bent tibia & femur                                       |
| 6  | CG3208    | RhoGAP5A       | 3     | lethal              | 41779   | fused tarsal segments; partially formed tarsal joints             | fused tarsal segments; partially formed tarsal joints    |
| 7  | CG4755    | RhoGAP92B      | 2     | viable              | 34895   | bent tibia & femur                                                | NP                                                       |
| 8  | CG30115   | RhoGEF         | 1     | viable              | 39952   | NP                                                                | bent tibia & femur                                       |
| 9  | CG7893    | vav GAP        | 3     | viable              | 6241    | NP                                                                | NP                                                       |
| 10 | CG7893    | vav GAP        | 1     | viable              | 6243    | NP                                                                | NP                                                       |
| 11 | CG32239   | RhoGEF64C      | 3     | viable              | 34470   | at 18°C living flies with leg stumps                              | necrotic tissue instead of legs                          |
| 12 | CG32239   | RhoGEF64C      | 3     | viable              | 47121   | at 18°C living flies with leg stumps                              | necrotic tissue instead of legs                          |
| 13 | CG4937    | RhoGAP15B      | 3     | lethal              | 24679   | bent tibia                                                        | NP; maybe embryonic lethal                               |
| 14 | CG4937    | RhoGAP15B      | 2     | viable              | 24678   | NP                                                                | NP                                                       |
| 15 | CG32555   | RhoGAPp190     | 3     | viable              | 28877   | NP                                                                | NP                                                       |
| 16 | CG32555   | RhoGAPp190     | 2     | viable              | 35870   | NP                                                                | NP                                                       |
| 17 | CG18214   | trio GEF       | 3     | sterile             | 40137   | bent tibia & femur; slight thinning of tarsus                     | small vesicles extruded apically                         |
| 18 | CG18214   | trio GEF       | 3     | viable              | 40138   | NP                                                                | NP                                                       |
| 19 | CG7397    | RhoGEF         | 2     | viable              | 13094   | NP                                                                | NP                                                       |
| 20 | CG7397    | RhoGEF         | 2     | viable              | 13429   | NP                                                                | NP                                                       |
| 21 | CG3799    | RhoGEF Ephexin | 3     | viable              | 41962   | bent tibia & femur                                                | bent tibia & femur, necrosis of joints                   |
| 22 | CG3799    | RhoGEF Ephexin | 3     | viable              | 41960   | NP                                                                | NP                                                       |
| 23 | CG31536   | Cdep GEF       | 1     | viable              | 25049   | NP                                                                | NP                                                       |
| 24 | CG31536   | Cdep GEF       | 2     | viable              | 25050   | NP                                                                | NP                                                       |
| 25 | CG8557    | RhoGEF         | 2     | viable              | 28927   | bent tibia & femur                                                | some tarsal defects                                      |
| 26 | CG8557    | RhoGEF         | 3     | viable              | 28928   | NP                                                                | tarsus bent and thinner                                  |
| 27 | CG15611   | RhoGEF         | 3     | viable              | 8986    | NP                                                                | NP                                                       |
| 28 | CG8606    | RhoGEF4        | 2     | viable              | 48213   | NP                                                                | NP                                                       |
| 29 | CG8948    | Graf GAP       | 3     | viable              | 42165   | NP                                                                | NP                                                       |
| 30 | CG7122    | RhoGAP16F      | 2     | viable              | 47697   | bent tibia & femur                                                | NP                                                       |
| 31 | CG7122    | RhoGAP16F      | 1     | viable              | 27864   | bent tibia & femur                                                | bent tibia & femur                                       |
| 32 | CG1412    | RhoGAP19D      | 1     | viable              | 43955   | bent tibia & femur                                                | Some legs short and fat                                  |
| 33 | CG10043   | RhoGEF rtGEF   | 3     | viable              | 17966   | NP                                                                | NP                                                       |
| 34 | CG10043   | RhoGEF rtGEF   | 3     | lethal              | 17965   | larval lethal                                                     | NP; maybe embryonic lethal                               |
| 35 | CG1225    | RhoGEF3        | 3     | lethal              | 31716   | NP                                                                | larval lethal                                            |
| 36 | CG1225    | RhoGEF3        | 3     | viable              | 31718   | NP                                                                | NP                                                       |
| 37 | CG7323    | RhoGEF         | 3     | viable              | 15631   | bent tibia & femur                                                | NP                                                       |
| 38 | CG5406    | sif GEF        | 3     | lethal              | 27407   | NP                                                                | NP                                                       |
| 39 | CG5406    | sif GEF        | 3     | viable              | 27406   | NP                                                                | NP                                                       |
| 40 | CG7793    | sos GEF        | 2     | viable              | 42848   | no claw and t5; tarsal segments fused; partial joints; bent femur | no claws and t5; fused tarsal segments; partial joints   |
| 41 | CG7793    | sos GEF        | 2     | lethal              | 42849   | no claw and t5; tarsal segments fused; partial joints; bent femur | no claws and t5; fused tarsal segments; partial joints   |
| 42 | CG10188   | RhoGEF         | 3     | viable              | 18029   | NP                                                                | NP                                                       |
| 43 | CG30456   | RhoGEF         | 3     | viable              | 21186   | NP                                                                | NP                                                       |
| 44 | CG30456   | RhoGEF         | 2     | viable              | 21187   | NP                                                                | bent tibia & femur                                       |
| 45 | CG6477    | RhoGAP54D      | 2     | viable              | 27639   | NP                                                                | tarsal joint necrosis                                    |
| 46 | CG6477    | RhoGAP54D      | 2     | viable              | 27638   | NP                                                                | NP                                                       |
| 47 | CG3421    | RhoGAP93B      | 2     | lethal              | 41934   | NP                                                                | NP                                                       |
| 48 | CG3421    | RhoGAP93B      | 3     | sterile             | 41933   | NP                                                                | NP                                                       |
| 49 | CG7481    | RhoGAP18B      | 3     | lethal              | 28040   | NP                                                                | Sporadic nectotic spots on cuticle                       |
| 50 | CG7481    | RhoGAP18B      | 3     | sterile             | 28039   | NP                                                                | NP                                                       |
| 51 | CG2595    | RhoGAP84C      | 3     | viable              | 43718   | NP                                                                | NP                                                       |
| 52 | CG2595    | RhoGAP84C      | 2     | viable              | 43717   | NP                                                                | NP                                                       |
| 53 | CG33275   | RhoGEF         | 2     | lethal              | 34385   | NP                                                                | NP                                                       |
| 54 | CG33275   | RhoGEF         | 2     | viable              | 52654   | NP                                                                | NP                                                       |
| 55 | CG33275   | RhoGEF         | 3     | viable              | 34386   | NP                                                                | larval lethal; at 18°C fused tarsal segments             |
| 56 | CG34389   | Cv-c GAP       | 3     | sterile             | 40238   | NP                                                                | NP                                                       |
| 57 | CG1748    | RhoGAP102A     | 2     | viable              | 32933   | NP                                                                | NP                                                       |
| 58 | CG1748    | RhoGAP102A     | 1     | viable              | 32936   | NP                                                                | NP                                                       |

\* If a VDRG stock is lethal or sterile it is kept over a balancer.Cyo on 2nd and TM3 on 3rd.
